# Supplementary material
Source: PubMed Central journal article supplement (PMC4097670)
Supplement: MCB.00076-14_zmb999100501so1.pdf [file MCB.00076-14_zmb999100501so1.pdf]

## **SUPPLEMENTAL MATERIAL**

### **MOVIE LEGENDS**

**Supplemental Videos 1&2. MCF7 cells stably expressing 14-3-3 $\tau$  undergo more dynamic morphological changes than that expressing the empty vector (related to Fig. 2B).** MCF7 cells stably expressing 14-3-3 $\tau$  (video1) or an empty vector (video2) were transiently transfected with EGFP-TRIP6 on the glass-bottomed dishes. After 24 hr transfection, cells were stimulated with 0.1  $\mu$ g/ml EGF, and the images of cell movement were captured every 20 sec during a 30-min period. Movies showed the images of EGFP-TRIP6, and were played at five frames/sec.
